# Supplementary material for: Rapid Detection of Single- and Co-Contaminant Aflatoxins and Fumonisins in Ground Maize Using Hyperspectral Imaging Techniques
Source: MDPI journal article supplement (doi:10.3390/toxins15070472), 2023-07-22
Supplement: s1 [file s1]

## Article

# Rapid Detection of Single- and Co-contaminant Aflatoxins and Fumonisin in Ground Maize using Hyperspectral Imaging Techniques

Yong-Kyoung Kim <sup>1</sup>, Insuck Baek <sup>2</sup>, Kyung-Min Lee <sup>3</sup>, Geonwoo Kim <sup>2,4</sup>, Seyeon Kim <sup>1</sup>, Sung-Youn Kim <sup>1</sup>, Diane Chan <sup>2</sup>, Timothy J. Herrman <sup>3</sup>, Namkuk Kim <sup>1,\*</sup> and Moon S. Kim <sup>2,\*</sup>

<sup>1</sup> Division of Safety Analysis, Experiment & Research Institute, National Agricultural Products Quality Management Service, Gimcheon 39660, Republic of Korea; ykkim79@korea.kr (Y.-K.K.); syesther1114@korea.kr (S.K.); youn5326@korea.kr (S.-Y.K.)

<sup>2</sup> Environmental Microbial and Food Safety Laboratory, Agricultural Research Service, U.S. Department of Agriculture, Powder Mill Rd., Building 303 BARC-East, Beltsville, MD 20705, USA; insuck.baek@usda.gov (I.B.); geonwookim@gnu.ac.kr (G.K.); diane.chan@usda.gov (D.C.)

<sup>3</sup> Office of the Texas State Chemist, Texas A&M AgriLife Research, Texas A&M University System, College Station, TX 77841, USA; kml@otsc.tamu.edu (K.-M.L.); tjh@otsc.tamu.edu (T.J.H.)

<sup>4</sup> Department of Bio-industrial Machinery Engineering, College of Agriculture and Life Science, Gyeongsang National University, 501 Jinju-daero, Jinju-si 52828, Republic of Korea

\* Correspondence: nkvirus@korea.kr (N.K.); moon.kim@usda.gov (M.S.K.); Tel.: +82-54-429-7766 (N.K.); +1-301-504-8462 (M.S.K.)

**Table S1.** Chemometrics results of the PLS-DA and SVM model for mycotoxin-contaminated samples analyzed by Fluorescence combined with different preprocessing methods.

| Preprocessing Method | PLS-DA          |                |           |        |          | SVM             |                |           |        |          |
|----------------------|-----------------|----------------|-----------|--------|----------|-----------------|----------------|-----------|--------|----------|
|                      | Calibration (%) | Validation (%) |           |        |          | Calibration (%) | Validation (%) |           |        |          |
|                      | Accuracy        | Accuracy       | Precision | Recall | F1 score | Accuracy        | Accuracy       | Precision | Recall | F1 score |
| Raw                  | 52.2            | 32.6           | 48.6      | 32.6   | 34.9     | 50.5            | 39.1           | 29.1      | 40.9   | 29.6     |
| Max                  | 58.3            | 39.1           | 52.8      | 39.4   | 41.3     | 92.9            | 80.4           | 81.1      | 80.1   | 80.0     |
| Mean                 | 57.7            | 37.0           | 51.3      | 37.1   | 39.5     | 95.1            | 26.1           | 6.5       | 25.0   | 10.3     |
| Range                | 57.7            | 37.0           | 46.6      | 37.3   | 39.1     | 92.9            | 87.0           | 87.1      | 86.6   | 86.2     |
| SNV                  | 39.2            | 32.6           | 41.7      | 32.6   | 28.0     | 97.3            | 89.1           | 90.2      | 88.6   | 88.7     |
| MSC                  | 39.0            | 32.6           | 41.7      | 32.6   | 28.0     | 50.5            | 26.1           | 6.5       | 25.0   | 10.3     |
| Smoothing            | 51.6            | 30.4           | 44.5      | 30.3   | 32.0     | 50.5            | 41.3           | 32.2      | 43.2   | 32.3     |
| SG1                  | 42.3            | 32.6           | 39.3      | 32.2   | 30.3     | 50.5            | 37.0           | 26.2      | 38.6   | 27.9     |
| SG2                  | 43.7            | 34.8           | 40.6      | 34.5   | 32.0     | 100             | 67.4           | 71.7      | 67.6   | 67.9     |

<sup>a</sup>Precision, Recall, F1 scores are average value of each groups.

**Table S2.** Chemometrics results of the PLS-DA, SVM model for mycotoxin-contaminated samples analyzed by VNIR combined with different preprocessing methods.

| Preprocessing Method | PLS-DA          |                |           |        |          | SVM             |                |           |        |          |
|----------------------|-----------------|----------------|-----------|--------|----------|-----------------|----------------|-----------|--------|----------|
|                      | Calibration (%) | Validation (%) |           |        |          | Calibration (%) | Validation (%) |           |        |          |
|                      | Accuracy        | Accuracy       | Precision | Recall | F1 score | Accuracy        | Accuracy       | Precision | Recall | F1 score |
| Raw                  | 31.3            | 28.3           | 38.6      | 28.4   | 21.4     | 87.9            | 63.0           | 62.5      | 63.1   | 62.7     |
| Max                  | 30.2            | 23.9           | 12.3      | 24.1   | 16.1     | 85.9            | 71.7           | 71.2      | 71.4   | 71.1     |
| Mean                 | 29.7            | 23.9           | 12.0      | 24.1   | 15.9     | 100             | 26.1           | 6.5       | 25.0   | 10.3     |
| Range                | 28.6            | 21.7           | 11.0      | 22.0   | 14.6     | 81.3            | 71.7           | 72.6      | 71.6   | 71.9     |
| SNV                  | 20.3            | 19.6           | 9.2       | 20.1   | 12.2     | 99.5            | 67.4           | 67.7      | 67.0   | 67.1     |
| MSC                  | 24.7            | 23.9           | 23.9      | 24.2   | 18.6     | 99.5            | 26.1           | 6.5       | 25.0   | 10.3     |
| Smoothing            | 31.3            | 30.4           | 39.7      | 30.7   | 22.8     | 90.1            | 60.9           | 61.7      | 61.0   | 61.1     |
| SG1                  | 29.1            | 26.1           | 13.0      | 26.3   | 17.3     | 100             | 50.0           | 47.9      | 49.2   | 48.4     |

|            |      |      |      |      |      |      |      |      |      |      |
|------------|------|------|------|------|------|------|------|------|------|------|
| <b>SG2</b> | 28.6 | 34.8 | 40.6 | 34.5 | 32.0 | 79.1 | 67.4 | 71.7 | 67.6 | 67.9 |
|------------|------|------|------|------|------|------|------|------|------|------|

**Table S3.** Chemometrics results of the PLS-DA, SVM model for mycotoxin-contaminated samples analyzed by SWIR combined with different preprocessing methods.

| Preprocessing<br>Method | PLS-DA      |          |            |        |          | SVM         |          |            |        |          |
|-------------------------|-------------|----------|------------|--------|----------|-------------|----------|------------|--------|----------|
|                         | Calibration |          | Validation |        |          | Calibration |          | Validation |        |          |
|                         | (%)         |          | (%)        |        |          | (%)         |          | (%)        |        |          |
|                         | Accuracy    | Accuracy | Precision  | Recall | F1 score | Accuracy    | Accuracy | Precision  | Recall | F1 score |
| <b>Raw</b>              | 58.2        | 56.5     | 65.1       | 56.4   | 57.3     | 97.8        | 89.1     | 90.8       | 88.8   | 89.0     |
| <b>Max</b>              | 58.8        | 60.9     | 77.0       | 60.6   | 57.4     | 91.8        | 95.7     | 96.2       | 95.8   | 95.6     |
| <b>Mean</b>             | 53.3        | 58.7     | 68.9       | 58.5   | 58.2     | 26.1        | 26.1     | 6.5        | 25.0   | 10.3     |
| <b>Range</b>            | 54.9        | 50.0     | 63.9       | 49.8   | 49.9     | 87.4        | 87.0     | 91.2       | 86.7   | 86.8     |
| <b>SNV</b>              | 59.9        | 54.3     | 66.8       | 54.2   | 53.3     | 100         | 91.3     | 92.1       | 91.3   | 91.5     |
| <b>MSC</b>              | 57.1        | 54.3     | 66.8       | 54.2   | 53.3     | 100         | 23.9     | 6.0        | 25.0   | 9.6      |
| <b>Smoothing</b>        | 59.9        | 52.2     | 60.1       | 52.1   | 52.5     | 96.7        | 89.1     | 90.8       | 88.8   | 89.0     |
| <b>SG1</b>              | 59.3        | 47.8     | 61.7       | 47.5   | 50.4     | 100         | 95.7     | 95.8       | 95.6   | 95.6     |
| <b>SG2</b>              | 59.9        | 34.8     | 40.6       | 34.5   | 32.0     | 98.4        | 67.4     | 71.7       | 67.6   | 67.9     |
